# Supplementary material for: Carbon nano-onions from waste oil for application in energy storage devices
Source: Royal Society of Chemistry journal article supplement (doi:10.1039/d0nj00699h), 2020-01-01
Supplement: d0nj00699h1.pdf [file d0nj00699h1.pdf]

Supporting Information

# Carbon Nano-Onions from Waste Oil for Application in Energy Storage Devices

*SungHoon Jung<sup>a||</sup>, Yusik Myung<sup>a||</sup>, Gouri Sankar Das<sup>a</sup>, Amit Bhatnagar<sup>b</sup>, Jun-Woo Park<sup>c</sup>,  
Kumud Malika Tripathi<sup>d\*</sup>, TaeYoung Kim<sup>a\*</sup>*

<sup>a</sup>Department of Materials Science and Engineering, Gachon University, 1342 Seongnam-daero, Sujeong-gu Seongnam-si, Gyeonggi-do 13120, South Korea

<sup>b</sup>Department of Environmental and Biological Sciences, University of Eastern Finland, FI-70211, Kuopio, Finland

<sup>c</sup>Next Generation Battery Research Center, Korea Electrotechnology Research Institute, 12 Bulmosan-ro, Seonggan-gu, Changwon-si, Gyeongsangnam-do 51543, Korea

<sup>d</sup>*Department of Chemistry, Indian Institute of Petroleum and Energy, Visakhapatnam, India*

\* Corresponding Author. E-mail address: [kumud20010@gmail.com](mailto:kumud20010@gmail.com) (K. M. Tripathi) and [taeykim@gachon.ac.kr](mailto:taeykim@gachon.ac.kr) (TaeYoung Kim)

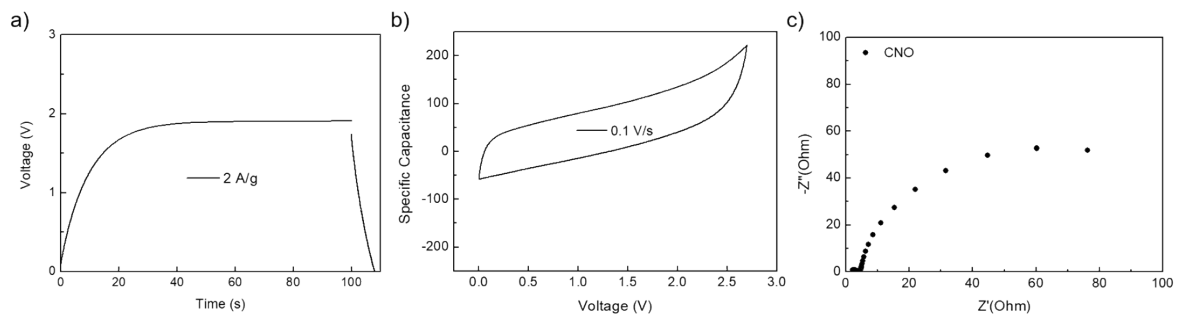

**Figure S1.** (a) Galvanostatic charge-discharge curves of CNO electrode with 1 M TEABF<sub>4</sub> electrolyte. (b) Cyclic voltammetry profile, (c) Nyquist plot
